# Supplementary material
Source: publisher site journal article supplement (https://natureconservation.pensoft.net/article/38279/download/suppl/31/)

"Nomen omen. Toponyms predict recolonization and extinction patterns for large carnivores" by Clara Tattoni

### Supplemental Figure 1

Relationship between the degree of accuracy (Kappa) and the area occupied by the species according to the literature at different thresholds of the density distribution with the regression line for each. The thresholds of 90% (core home range) give better results for smaller range of occurrence and the 50% (home range) for larger ranges. At the 95% threshold, the core area in home range analysis, the accuracy increases for smaller ranges of occurrence ( $R^2=0.93$ ), while using the 50% threshold (home range) the accuracy increases for larger areas of the presence of the species ( $R^2=0.96$ ). The 90 and 70 percent thresholds does not fit so well. In conclusion using the standard thresholds of home range analysis is meaningful for overlapping toponym density with historical distributions.

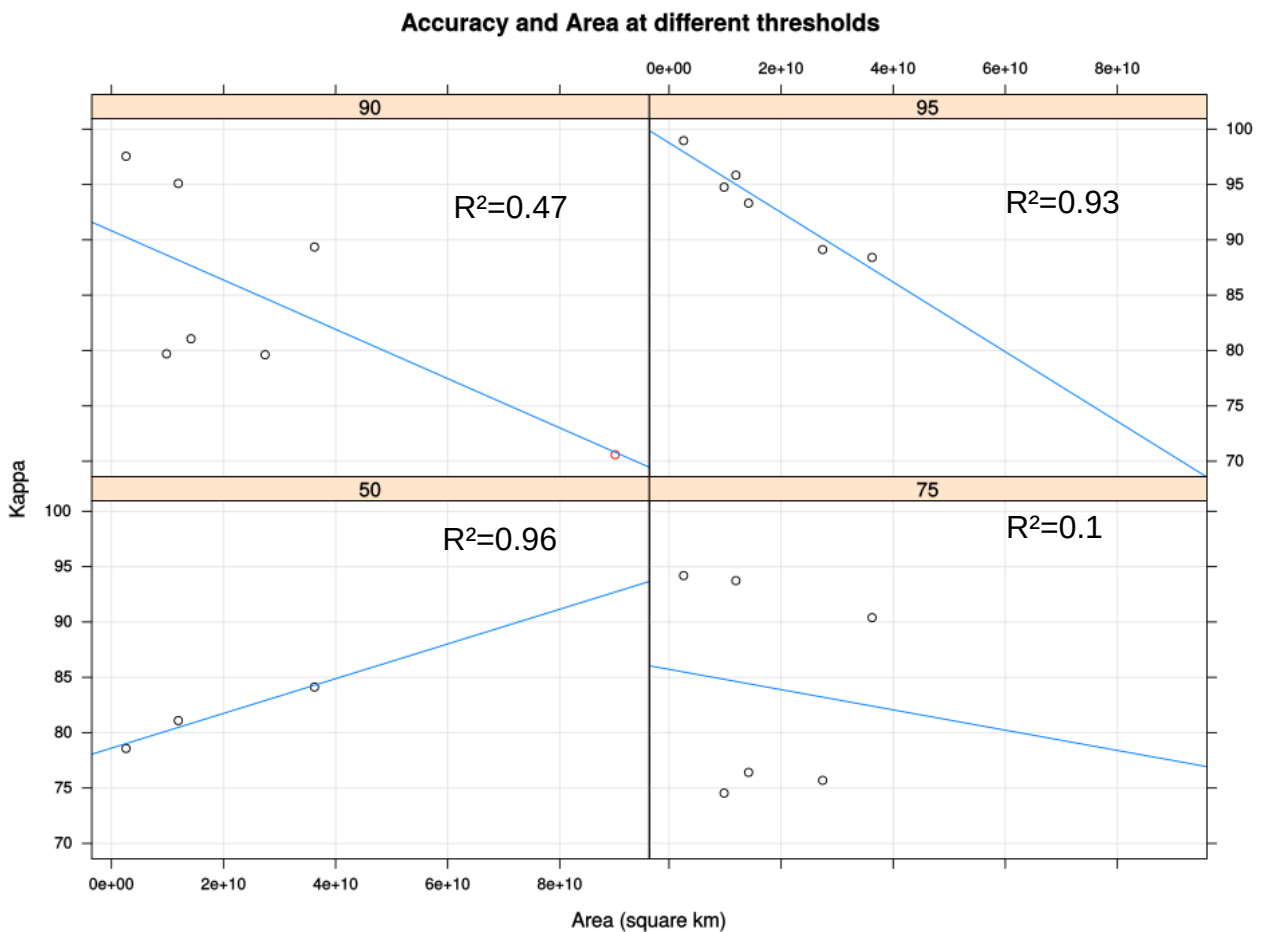

Supplement: Supplementary file 1
